# Supplementary material
Source: PubMed Central journal article supplement (PMC2652196)

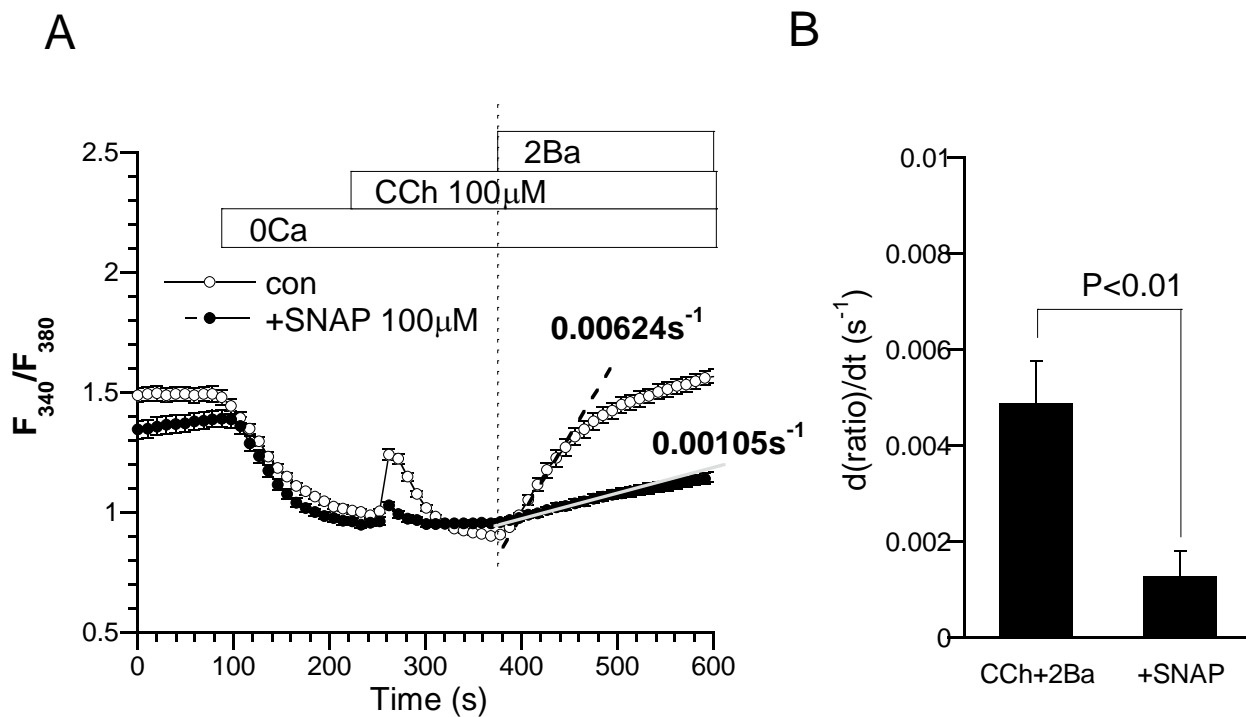

Suppl. Fig.1

A

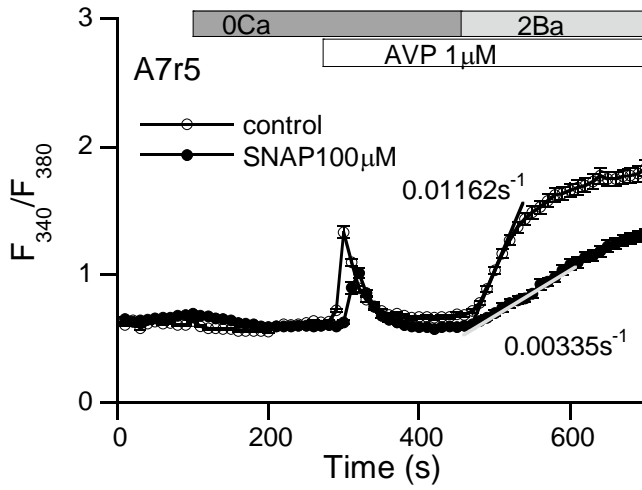

B

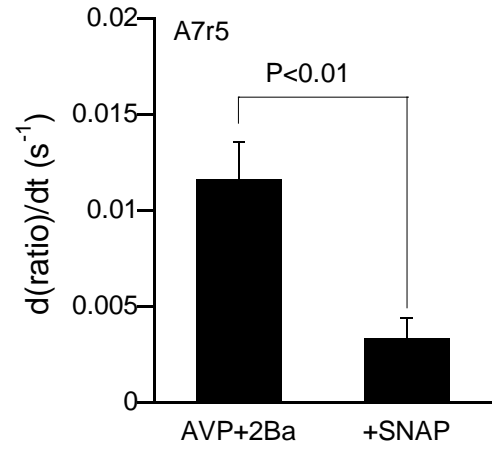

Suppl. Fig.2

A

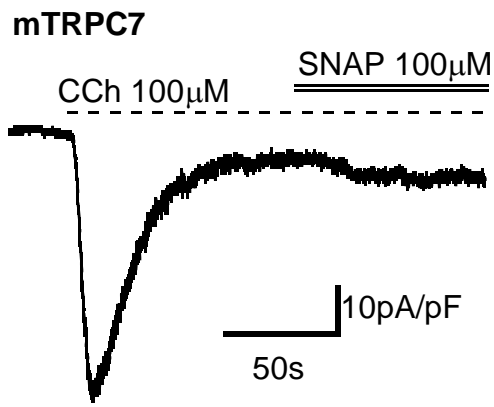

B

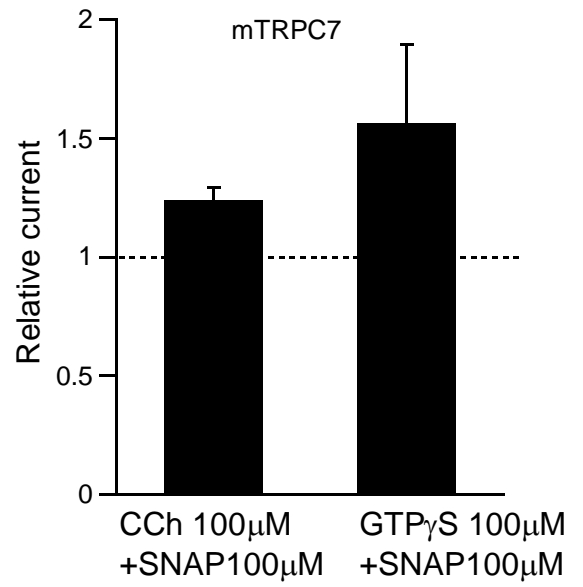

Suppl. Fig.3

Supplement: 2008.156083_1.pdf [file 2008.156083_1.pdf]
